# Supplementary material for: The structure and formation of hydrogen-bonded molecular networks on Au(111) surfaces revealed by scanning tunnelling and torsional-tapping atomic force microscopy
Source: Royal Society of Chemistry journal article supplement (doi:10.1039/c2cp43199h), 2012-01-01
Supplement: c2cp43199h.pdf [file c2cp43199h.pdf]

### Supplementary information

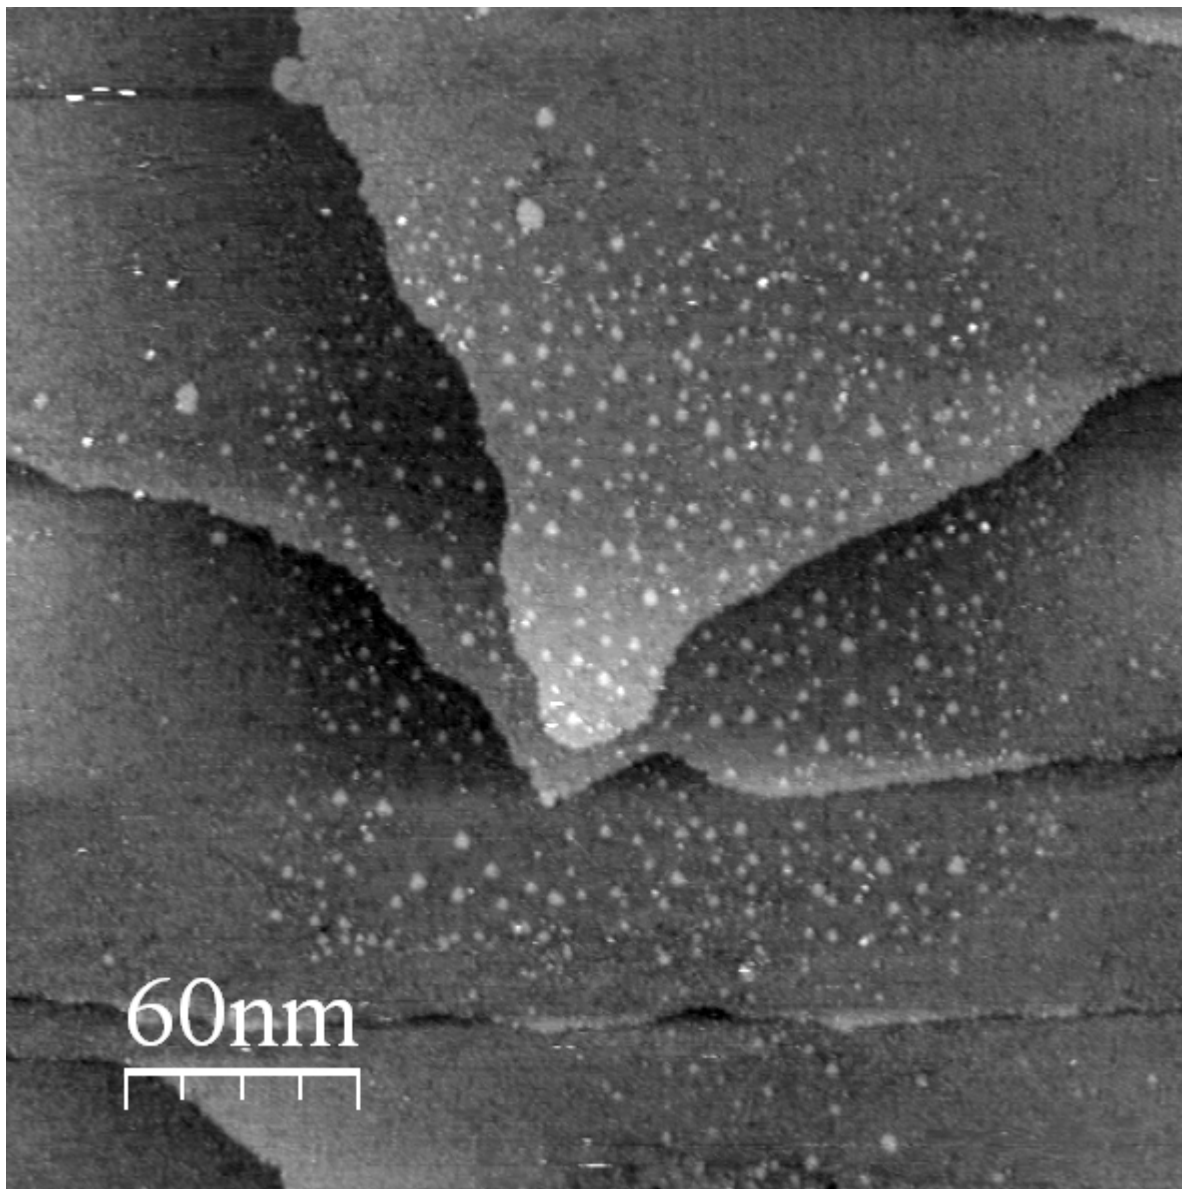

300 nm x 300 nm STM image of the network sample on Au-surface imaged after continuous high voltage (-1V) scanning was performed on 200 nm x 200 nm area. The inner area contains particles and disrupted material caused by high voltage imaging.
